# Supplementary material
Source: PubMed Central journal article supplement (PMC8927895)
Supplement: sj-pdf-1-apy-10.1177_10398562221077887.pdf [file sj-pdf-1-apy-10.1177_10398562221077887.pdf]

# Psychological impact of COVID-19 pandemic on perioperative staff at the Royal Melbourne Hospital - a longitudinal study

Record ID \_\_\_\_\_

## Individual code

What is the name of your favourite pet? \_\_\_\_\_

What is your favourite drink? \_\_\_\_\_

## Demographics

What is your age group?

- 20 - 30
- >30 - 40
- >40 - 50
- >50 - 60
- >60 - 70
- >70

What gender do you identify with?

- Male
- Female
- Other (specify if you wish)

Please specify if you wish \_\_\_\_\_

Do you live with a child < 16 years old?

- Yes
- No

Do you live with an adult > 65 years old?

- Yes
- No

What is your perioperative role?

- Anaesthetic consultant
- Anaesthetic nurse
- Anaesthetic trainee
- Scrub nurse
- Surgical consultant
- Surgical trainee
- Technician
- Other (please specify)

Other Role (please specify here) \_\_\_\_\_

How many hours did you work on average per week, in the last 4 weeks? \_\_\_\_\_

How many years have you worked at your current role? \_\_\_\_\_

Where did you work the most in the last 4 weeks?

- Operating theatre
- Intensive care unit
- Recovery area
- Emergency department
- Dedicated COVID ward
- Non-COVID ward
- Other (please specify)

Other Location (please specify here)

\_\_\_\_\_

### Recent COVID exposure

In the last 4 weeks, how many suspected/confirmed COVID patients did you encounter?

\_\_\_\_\_

In the last 4 weeks, how many COVID-related deaths did you encounter?

\_\_\_\_\_

In the last 4 weeks, have you been tested COVID positive?

- Yes
- No

In the last 4 weeks, have you been quarantined?

- Yes
- No

In the last 4 weeks, do you have close friends or relatives who contracted COVID-19?

- Yes
- No

In the last 4 weeks, do you have close friends or relatives who died from COVID-19?

- Yes
- No

### Baseline health

Have you previously been diagnosed with anxiety, depression or post-traumatic stress disorder (PTSD)?

- Yes
- No
